# Supplementary material
Source: PubMed Central journal article supplement (PMC3815666)
Supplement: NIHMS484753-supplement-ESI.pdf [file NIHMS484753-supplement-ESI.pdf]

# Sequence-dependent Thymine Dimer Formation and Photoreversal Rates in Double-stranded DNA

## Supplementary Information

*Yu Kay Law,<sup>1,2</sup> Robert A. Forties,<sup>3</sup> Xin Liu,<sup>2</sup> Michael G. Poirier<sup>1,2,3\*</sup> and Bern Kohler<sup>4\*</sup>*

Biophysics Program<sup>1</sup> and Departments of Chemistry<sup>2</sup> and Physics,<sup>3</sup> The Ohio State University,  
Columbus, OH 43210

<sup>4</sup>Department of Chemistry and Biochemistry, Montana State University, Bozeman, MT, 59717

AUTHOR EMAIL ADDRESSES: [mpoirier@mps.ohio-state.edu](mailto:mpoirier@mps.ohio-state.edu) (MGP);

[kohler@chemistry.montana.edu](mailto:kohler@chemistry.montana.edu) (BK)

### Supplementary Methods and Figures

*1. The Effect of Photobleaching of Fluorescent Dye Labels.* Irradiation of Cy5 and Cy3 dyes present by themselves in aqueous solution in the photochemical reactor using 254 nm light resulted in photobleaching of the dyes, as evidenced by lowered absorbance at their respective absorption peaks (Figure S3) and an accompanying decrease in total fluorescence intensity (Figure S4). For labeled DNA, the extent of photobleaching is reduced due to the much greater absorbance at 254 nm by the nucleobases. Nonetheless, the total fluorescence intensity from all bands in an irradiated sample was observed to decrease slightly with increasing irradiation time. By normalizing the fluorescence of all bands in each lane separately, the observed kinetics are unaffected by the small amount of dose-dependent photobleaching.

Because of the low triplet quantum yield for the Cy3 and Cy5 dyes<sup>1</sup> and because CPD damage was followed at sites at least 30 bp away from the labeled end, no additional CPD formation is expected

due to triplet sensitization by a photoexcited dye molecule. In an earlier study, the use of a different fluorescent dye (6-carboxyfluorescein) as a labeling chromophore was shown to not affect the kinetics of dimer formation.<sup>2</sup>

a. MP2+50 Nucleosome Binding Sequence<sup>3</sup>

Cy5 strand

AAGCT**TT**GCAT GCAGATCTAT GTCGGGCTCG TCCT**TT**ATCGA GCTCGGTCCG ACAGGATGTA  
TATATCTGAC ACGTGCCTGG AGACTAGGGA GTAATCCCCT **TGGCGTTTAA** AACGCGGGGG  
ACAGCGCGTA CG**TT**CGATCA AGCGGATCCA GAGCT**TT**GCTA CGACCA**TTG** AGCGGCCCG  
GCACCAAGCT **TCTGCAGTGA** TCATCCCCGC ACCTCGTCAA CCGGA**ATTCA** CTGGCCGTCG  
**TTTTACA**

Cy3 strand

TGTA AACGA CGGCCAGTGA **ATTCCGGTTG** ACGAGGTGCG GGGATGATCA CTGCAGAAGC  
**TTGGTGCCGG** GGCCGCTCAA **TTGGTCGTAG** CAAGCTCTGG ATCCGCT**TTGA** TCGAACGTAC  
GCGCTGTCCC CCGCG**TTTTA** AACGCCAAGG GG**ATTACTCC** CTAGTCTCCA GGCACGTGTC  
AGATATATAC ATCCTGTCCG ACCGAGCTCG ATAAGGACGA GCCCGACATA GATCTGCATG  
CAAGCT**TT**

b. 5S+50 Nucleosome Binding Sequence<sup>4</sup>

Cy5 strand

AAGCT**TT**GCAT GCAGATCTAT GTCGGGCTCG TCCT**TT**ATCGA GCTCGGTCCG AACCGAGCCC  
TATGCTGCT**TT** GACT**TT**CGGTG ATCGGACGAG AACCGGTATA **TT**CAGCATGG TATGGTCGTA  
GGCTC**TTGCT** **TGATGAAAGT** **TAAGCTATTT** AAAGGGTCAG GGATG**TTATG** ACGTCATCGG  
**CTTATAAATC** CCTGGAATGA TCATCCCCGC ACCTCGTCAA CCGGA**ATTCA** CTGGCCGTCG  
**TTTTACA**

Cy3 strand

TGTA AACGA CGGCCAGTGA **ATTCCGGTTG** ACGAGGTGCG GGGATGATCA **TTCCAGGGAT**  
**TTATAAGCCG** ATGACGTCAT AACATCCCTG ACC**TTTTAAA** TAGCT**TTAACT** **TT**CATCAAGC  
AAGAGCCTAC GACCATACCA TGCTGAATAT ACCGG**TTCTC** GTCCGATCAC CGAAGTCAAG  
CAGCATAGGG CTCGG**TT**CGG ACCGAGCTCG ATAAGGACGA GCCCGACATA GATCTGCATG  
CAAGCT**TT**

**Fig. S1.** 5S+50 and MP2+50 DNA sequences in 5' to 3' order. The strands are denoted by the dye (Cy5 or Cy3) attached to the 5'-end. The first fifty and final fifty base pairs are identical in both sequences. All thymine-thymine base steps are highlighted in bold.

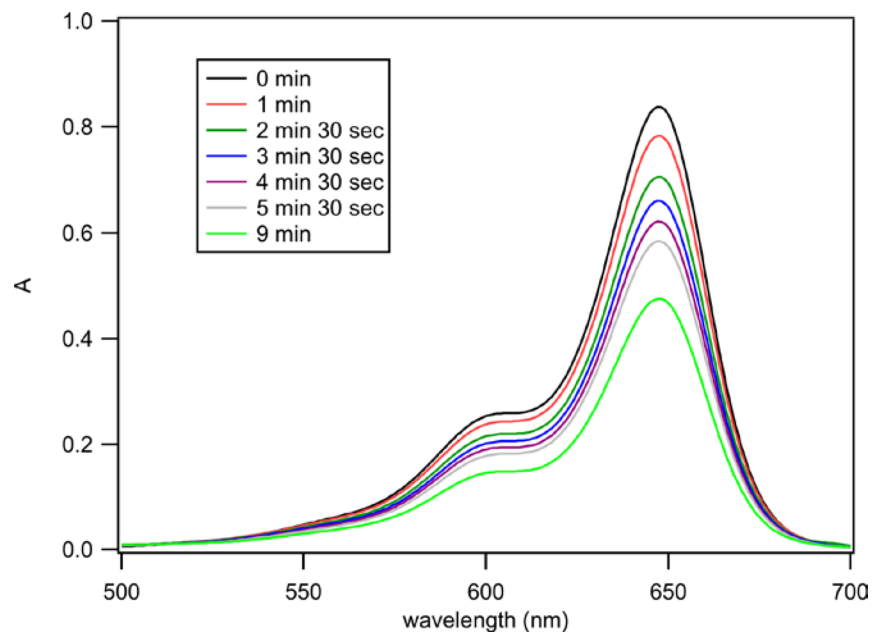

**Fig. S2.** Visible absorption spectra of Cy5 dye vs. irradiation time at 254 nm.

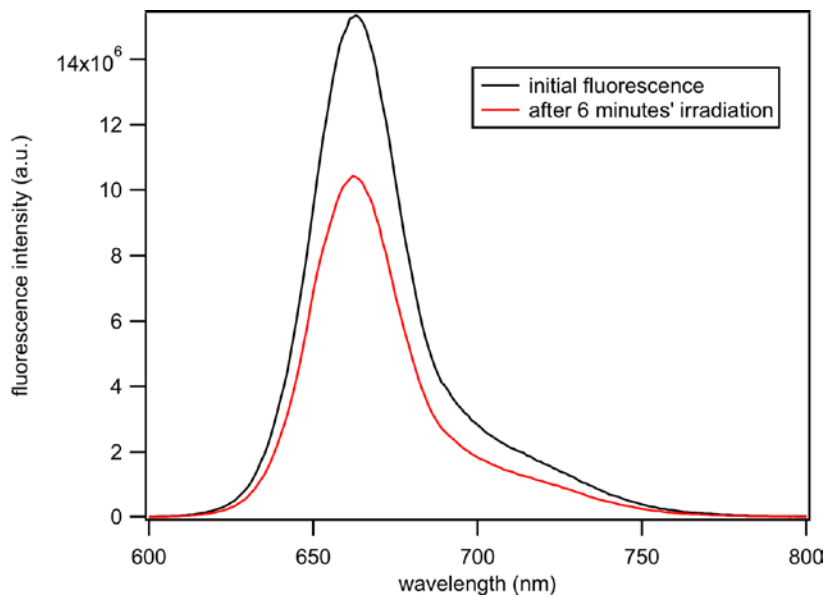

**Fig. S3.** Fluorescence spectra of Cy5 dye before and after irradiation at 254 nm.

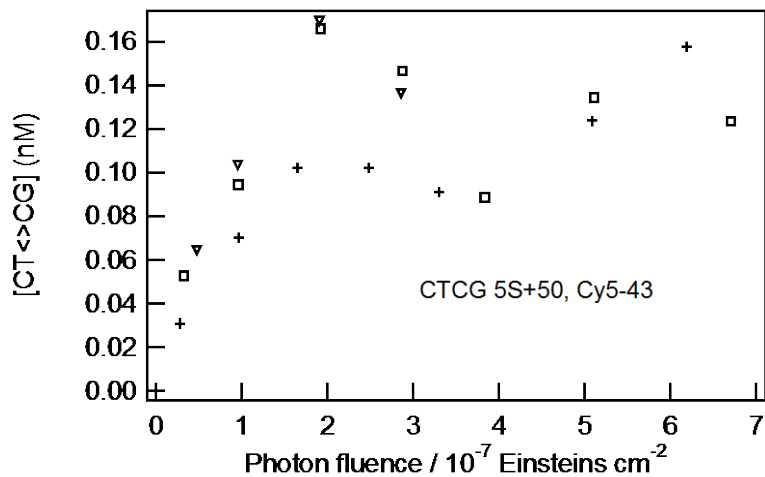

**Fig. S4.** Strand scission kinetics at the CTCG tetrad located at Cy5-43 on the 5S+50 sequence. Different symbols indicate separate trials.

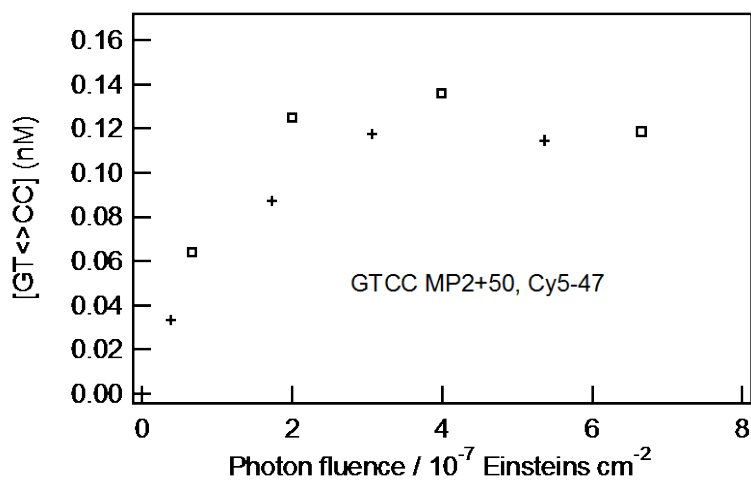

**Fig. S4.** Strand scission kinetics at the CTCG tetrad located at Cy5-43 on the 5S+50 sequence. Different symbols indicate separate trials.

**Table S1.** Relative Rates of TC Dimer Formation and Photoreversal relative to  $k_f$  for CTTA at Cy5-34.

| <b>Tetrad</b> | <b>Sequence</b> | <b>Position</b> | <b><math>k_f</math></b>           | <b><math>k_r</math></b>      |
|---------------|-----------------|-----------------|-----------------------------------|------------------------------|
| ATCA          | MP2+50          | Cy3-48          | $0.09 \pm 0.02$                   | $5 \pm 2$                    |
|               | 5S+50           | Cy3-167         | $0.14 \pm 0.08$                   | $10 \pm 6$                   |
|               | <i>Average</i>  |                 | <b><math>0.12 \pm 0.04</math></b> | <b><math>7 \pm 4</math></b>  |
| ATCC          | MP2+50          | Cy5-148         | $0.73 \pm 0.22$                   | $24 \pm 9$                   |
|               | MP2+50          | Cy5-204         | $0.44 \pm 0.19$                   | $9 \pm 5$                    |
|               | MP2+50          | Cy3-102         | $0.29 \pm 0.11$                   | $8 \pm 4$                    |
|               | 5S+50           | Cy5-189         | $0.26 \pm 0.10$                   | $9 \pm 4$                    |
|               | 5S+50           | Cy5-204         | $0.53 \pm 0.32$                   | $18 \pm 12$                  |
|               | 5S+50           | Cy3-85          | $0.59 \pm 0.22$                   | $18 \pm 7$                   |
|               | <i>Average</i>  |                 | <b><math>0.47 \pm 0.18</math></b> | <b><math>14 \pm 7</math></b> |
| ATCG          | 5S+50           | Cy5-82          | $0.06 \pm 0.02$                   | $7 \pm 3$                    |
| CTCC          | MP2+50          | Cy3-158         | $0.48 \pm 0.17$                   | $8 \pm 4$                    |
| CTCG          | MP2+50          | Cy5-43          | $0.31 \pm 0.09$                   | $11 \pm 4$                   |
|               | MP2+50          | Cy5-214         | $0.76 \pm 0.42$                   | $20 \pm 12$                  |
|               | 5S+50           | Cy5-43          | $0.20 \pm 0.06$                   | $15 \pm 5$                   |
|               | 5S+50           | Cy5-214         | $0.19 \pm 0.09$                   | $10 \pm 5$                   |
|               | 5S+50           | Cy3-191         | $0.22 \pm 0.10$                   | $14 \pm 7$                   |
|               | 5S+50           | Cy3-208         | $0.18 \pm 0.08$                   | $10 \pm 5$                   |
|               | <i>Average</i>  |                 | <b><math>0.31 \pm 0.22</math></b> | <b><math>13 \pm 4</math></b> |
| GTCC          | MP2+50          | Cy5-47          | $0.11 \pm 0.03$                   | $5 \pm 2$                    |
|               | MP2+50          | Cy3-127         | $0.20 \pm 0.04$                   | $4 \pm 1$                    |
|               | 5S+50           | Cy5-47          | $0.07 \pm 0.02$                   | $11 \pm 4$                   |
|               | <i>Average</i>  |                 | <b><math>0.13 \pm 0.07</math></b> | <b><math>7 \pm 4</math></b>  |

## References

1. A. K. Chibisov, Triplet states of cyanine dyes and reactions of electron transfer with their participation, *Journal of Photochemistry*, 1976, **6**, 199-214.
2. L. M. Kundu, U. Linne, M. Marahiel and T. Carell, RNA Is More UV Resistant than DNA: the Formation of UV-Induced DNA Lesions is Strongly Sequence and Conformation Dependent, *Chem. Eur. J.*, 2004, **10**, 5697-5705.
3. M. G. Poirier, M. Bussiek, J. Langowski and J. Widom, Spontaneous Access to DNA Target Sites in Folded Chromatin Fibers, *J. Mol. Biol.*, 2008, **379**, 772-786.
4. F. Dong, J. C. Hansen and K. E. van Holde, DNA and Protein Determinants of Nucleosome Positioning on Sea Urchin 5S rRNA Gene Sequences in Vitro, *Proc. Natl. Acad. Sci. USA*, 1990, **87**, 5724-5728.
